# Supplementary material
Source: PubMed Central journal article supplement (PMC4381787)

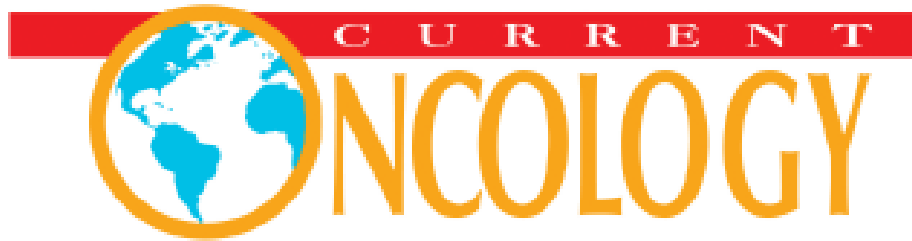

**Supplemental Materials for**

**Systemic targeted therapy for her2-positive early female breast cancer: a systematic review of the evidence for the 2014 Cancer Care Ontario systemic therapy guideline**

M. Mates, G.G. Fletcher, O.C. Freedman, A. Eisen, S. Gandhi, M. Trudeau, S.F. Dent

Correspondence to: Mihaela Mates, Cancer Centre of Southeastern Ontario at Kingston General Hospital, 25 King Street West, Kingston, ON K7L5P9. Tel: 613-544 2630 x 4502/4503, Email: matesm@KGH.KARI.NET

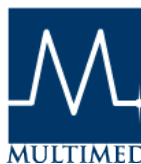

### Supplementary Table 1. Summary of Recommendations in Other Clinical Practice Guidelines

| Guideline                                                                                                                                 | Search Date, other details                                        | Recommendations                                                                                                                                                                                                                                                                                                                                                                                                                                                                                                                                                                                                                                                                                                                                                                                                                                                                                                                                                                                                                                                                                                                                                                                                                                                                                                                                                     |
|-------------------------------------------------------------------------------------------------------------------------------------------|-------------------------------------------------------------------|---------------------------------------------------------------------------------------------------------------------------------------------------------------------------------------------------------------------------------------------------------------------------------------------------------------------------------------------------------------------------------------------------------------------------------------------------------------------------------------------------------------------------------------------------------------------------------------------------------------------------------------------------------------------------------------------------------------------------------------------------------------------------------------------------------------------------------------------------------------------------------------------------------------------------------------------------------------------------------------------------------------------------------------------------------------------------------------------------------------------------------------------------------------------------------------------------------------------------------------------------------------------------------------------------------------------------------------------------------------------|
| NICE. Early and locally advanced breast cancer: diagnosis and treatment <sup>1</sup>                                                      | June 2008                                                         | <ul style="list-style-type: none"> <li>• Offer trastuzumab, administered at three-week intervals for one year or until disease recurrence (whichever is the shorter period), as an adjuvant treatment to patients with HER2-positive early invasive breast cancer following surgery, chemotherapy, and radiotherapy when applicable.</li> <li>• Assess cardiac function before starting treatment with trastuzumab. Do not offer trastuzumab treatment to patients who have any of the following:               <ul style="list-style-type: none"> <li>• a left ventricular ejection fraction (LVEF) of 55% or less</li> <li>• a history of documented congestive heart failure</li> <li>• high-risk uncontrolled arrhythmias</li> <li>• angina pectoris requiring medication</li> <li>• clinically significant valvular disease</li> <li>• evidence of transmural infarction on electrocardiograph (ECG)</li> <li>• poorly controlled hypertension</li> </ul> </li> <li>• Repeat cardiac functional assessments every three months during trastuzumab treatment. If the LVEF drops by 10 percentage (ejection) points or more from baseline and to &lt;50%, then trastuzumab treatment should be suspended. Restart trastuzumab therapy only after further cardiac assessment and a fully informed discussion of the risks and benefits with the woman.</li> </ul> |
| PEBC #1-24: The Role of Trastuzumab in Adjuvant and Neoadjuvant Therapy in Women with HER2/ neu-overexpressing Breast Cancer <sup>2</sup> | May 2006, update Sept 2009; original recommendation endorsed 2010 | <ul style="list-style-type: none"> <li>• Trastuzumab should be offered for one year to all patients with HER2 positive node- positive or node-negative, tumour &gt;1 cm in size, and primary breast cancer and who are receiving or have received (neo)adjuvant chemotherapy. Trastuzumab should be offered after chemotherapy.</li> </ul>                                                                                                                                                                                                                                                                                                                                                                                                                                                                                                                                                                                                                                                                                                                                                                                                                                                                                                                                                                                                                          |

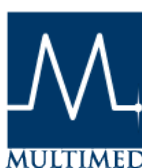

| Guideline                                                                                                                                                                     | Search Date, other details        | Recommendations                                                                                                                                                                                                                                                                                                                                                                                                                                                                                                                                                                                                                                                                                                                                                                                                                                                                                                                                                                                         |
|-------------------------------------------------------------------------------------------------------------------------------------------------------------------------------|-----------------------------------|---------------------------------------------------------------------------------------------------------------------------------------------------------------------------------------------------------------------------------------------------------------------------------------------------------------------------------------------------------------------------------------------------------------------------------------------------------------------------------------------------------------------------------------------------------------------------------------------------------------------------------------------------------------------------------------------------------------------------------------------------------------------------------------------------------------------------------------------------------------------------------------------------------------------------------------------------------------------------------------------------------|
| PEBC #1-17: The Role of HER2/neu in Systemic and Radiation Therapy for Women with Breast Cancer [archived] <sup>3</sup>                                                       | Dec 2005; Guideline archived 2011 | <ul style="list-style-type: none"> <li>• Patients with HER2/neu-positive breast cancer should be considered for chemotherapy containing an anthracycline instead of cyclophosphamide, methotrexate, and 5-fluorouracil (CMF) or melphalan and 5-fluorouracil (PF) chemotherapy.</li> <li>• Although the current evidence does not support a definitive recommendation regarding tamoxifen therapy and HER2/neu status, the weight of the evidence, especially the Gruppo Universitario Napoletano (GUN) trial, suggests that the efficacy of tamoxifen may be greater in patients with HER2/neu-negative cancer than with HER2/neu-positive cancer. However, the evidence does not support a recommendation against tamoxifen therapy in patients with HER2/neu-positive cancer. While it is possible that tamoxifen is more effective in patients with HER2/neu-negative cancer, there is still sufficient evidence that it is effective in patients with HER2/neu-positive cancer as well.</li> </ul> |
| National Breast Cancer Centre (NBCC) (now Cancer Australia). Recommendations for use of Trastuzumab (Herceptin) for the treatment of HER2-positive breast cancer <sup>4</sup> | Up to ≈ 2006                      | <ul style="list-style-type: none"> <li>• Patients should be informed of the potential side effects of trastuzumab and any uncertainties about long-term effects. Patients receiving trastuzumab should be reviewed regularly and monitored for side effects by clinicians familiar with the drug.</li> <li>• Adjuvant trastuzumab should be offered with chemotherapy following surgery in patients with node positive or node negative tumours larger than 1 cm. Trastuzumab concurrently with an anthracycline is not recommended due to risk of cardiotoxicity. Trastuzumab can be offered to patients who require radiotherapy, although long-term toxicity is unknown.</li> </ul>                                                                                                                                                                                                                                                                                                                  |

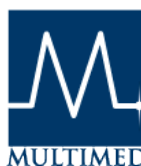

**Supplementary Table 2. HER2+ plus Trastuzumab, Lapatinib, and/or Pertuzumab RCTs**

| Study                                                                          | Trial arms                                                                                                                                                                                                                                                                                    | N   | Characteristics                                                                                       | Outcome                                                                                                                                                                                                                                                                                                                                                                                                                                                                                                                                                                                                                                                                                                                                                                                                            |
|--------------------------------------------------------------------------------|-----------------------------------------------------------------------------------------------------------------------------------------------------------------------------------------------------------------------------------------------------------------------------------------------|-----|-------------------------------------------------------------------------------------------------------|--------------------------------------------------------------------------------------------------------------------------------------------------------------------------------------------------------------------------------------------------------------------------------------------------------------------------------------------------------------------------------------------------------------------------------------------------------------------------------------------------------------------------------------------------------------------------------------------------------------------------------------------------------------------------------------------------------------------------------------------------------------------------------------------------------------------|
| <b>Neoadjuvant trastuzumab, lapatinib, or pertuzumab</b>                       |                                                                                                                                                                                                                                                                                               |     |                                                                                                       |                                                                                                                                                                                                                                                                                                                                                                                                                                                                                                                                                                                                                                                                                                                                                                                                                    |
| NeoALTTO<br>BIG 01-06<br>EGF 106903<br>NCT00553358 <sup>5,6</sup><br>2008-2010 | Oral lapatinib vs IV trastuzumab vs lapatinib + trastuzumab<br><br>Anti-HER2 for 6 w → weekly paclitaxel + anti-HER2 for 12 w → surgery → adjuvant FEC → same anti-HER2 as previously for 52 w                                                                                                | 455 | HER2+, >2 cm,                                                                                         | <ul style="list-style-type: none"> <li>Pathologically complete response (pCR) higher in lapatinib + trastuzumab group than trastuzumab alone (51.3% vs 29.5%, p=0.0001)</li> <li>pCR similar (p=0.34) in lapatinib and trastuzumab groups</li> <li>No major cardiac dysfunctions, grade 3 diarrhea and liver-enzyme alterations greater in lapatinib groups</li> <li>Conclude dual inhibition might be a valid approach</li> <li>Lapatinib + trastuzumab, lapatinib, trastuzumab arms: <ul style="list-style-type: none"> <li>Grade 3 diarrhea 21.1%, 23.4%, 2.0%</li> <li>Grade 3/4 hepatic effects 10.6%, 18.1%, 7.4%</li> <li>Grade 3/4 neutropenia 8.5%, 15.6%, 2.6%</li> <li>Grade 3 skin disorders 6.6%, 6.5%, 2.7%</li> </ul> </li> <li>Secondary endpoints of DFS and OS rates not reported yet</li> </ul> |
| ACOSOG Z1041 <sup>7,8</sup>                                                    | Neoadjuvant chemotherapy <ul style="list-style-type: none"> <li>Arm A: FEC-75 x4 → paclitaxel+ trastuzumab (q1wx12)</li> <li>Arm B: paclitaxel + trastuzumab (q1wx12) → FEC-75 + trastuzumab x4</li> </ul>                                                                                    | 282 | HER2+, operable                                                                                       | Ongoing; 282 enrolled, pCR 56% (95% CI 48-65) in sequential arm, vs 54.2% (95% CI 46-63) in concurrent arm, OR=0.90 (95% CI 0.55-1.49). The most common severe adverse effects were neutropenia (25.3% sequential vs 31.7% concurrent) and fatigue (4.3% vs 8.5%)                                                                                                                                                                                                                                                                                                                                                                                                                                                                                                                                                  |
| GeparQuinto<br>GBG 44 <sup>9,10</sup>                                          | Randomized to receive neoadjuvant trastuzumab or lapatinib:<br>EC + trastuzumab (q3wx4) → T + trastuzumab (q3wx4) vs EC + lapatinib → T + lapatinib<br>Pegfilgrastim administered with lapatinib as primary prophylaxis for febrile neutropenia and with trastuzumab as secondary prophylaxis | 620 | HER2+, ≥2 cm by palpation or ≥1 cm by sonography; cT1-4, 83% operable, 17% LABC, 31% CN0, 55% HR+     | <ul style="list-style-type: none"> <li>30.3% EC + trastuzumab → T + trastuzumab and 22.7% EC+ lapatinib → T + lapatinib group had pCR (OR=0.68, p=0.04)</li> <li>Trastuzumab associated with more edema (39.1% vs 28.7%) and dyspnea (29.6% vs 21.4%) and less diarrhea and skin rash</li> <li>Still ongoing, no long-term data</li> </ul>                                                                                                                                                                                                                                                                                                                                                                                                                                                                         |
| NeoSphere <sup>11</sup><br>NCT00545688                                         | A. trastuzumab + docetaxel<br>B. Pertuzumab + trastuzumab + docetaxel<br>C. Pertuzumab + trastuzumab<br>D. Pertuzumab + docetaxel<br>All administered for 4 cycles neoadjuvant                                                                                                                | 417 | HER2+; stratified by operable, locally advanced, and inflammatory, and by hormone receptor expression | B vs A, pCR 45.8% vs 29%<br>D vs C, pCR 24.0% vs 16.8%<br>Grade 3 neutropenia and leucopenia similar in Groups A, B, D; almost zero in group C<br>Serious adverse events similar in A, B, D; lower in C<br>Small study will not measure survival effects                                                                                                                                                                                                                                                                                                                                                                                                                                                                                                                                                           |

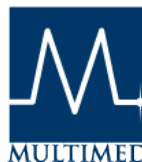

| Study                                              | Trial arms                                                                                                                                                                                                                                       | N                                 | Characteristics                                                                                                                                                                        | Outcome                                                                                                                                                                                                                                                                                                                                                                                                                                                                                                                                                                                                                                                                                                                                                                                                 |
|----------------------------------------------------|--------------------------------------------------------------------------------------------------------------------------------------------------------------------------------------------------------------------------------------------------|-----------------------------------|----------------------------------------------------------------------------------------------------------------------------------------------------------------------------------------|---------------------------------------------------------------------------------------------------------------------------------------------------------------------------------------------------------------------------------------------------------------------------------------------------------------------------------------------------------------------------------------------------------------------------------------------------------------------------------------------------------------------------------------------------------------------------------------------------------------------------------------------------------------------------------------------------------------------------------------------------------------------------------------------------------|
| JBCRG-10 <sup>12,13</sup><br>[abstract]            | Neoadjuvant chemotherapy<br>1. FEC x4→TCH x4<br>2. TCH x4→FEC x4<br>3. TCH x6                                                                                                                                                                    | 180<br>planned<br>; 103<br>actual | HER2+, T1C-3, N0-1, M0                                                                                                                                                                 | FEC arms were discontinued after interim analysis and there was insufficient power for conclusions on preferable sequence; decrease in LVEF was significant for FEC→TCH arm                                                                                                                                                                                                                                                                                                                                                                                                                                                                                                                                                                                                                             |
| ADAPT HER2+/HR+ <sup>14</sup>                      | Neoadjuvant therapy (12 w)<br>T-DM1 vs T-DM1 + endocrine therapy<br>vs trastuzumab + endocrine therapy                                                                                                                                           | 380<br>planned                    | HER2+ HR+                                                                                                                                                                              | Ongoing                                                                                                                                                                                                                                                                                                                                                                                                                                                                                                                                                                                                                                                                                                                                                                                                 |
| ADAPT HER2+/HR- <sup>14</sup>                      | Neoadjuvant therapy (12 w)<br>Trastuzumab + pertuzumab vs<br>trastuzumab + pertuzumab +<br>paclitaxel                                                                                                                                            | 220<br>planned                    | HER2+ HR-                                                                                                                                                                              | Ongoing                                                                                                                                                                                                                                                                                                                                                                                                                                                                                                                                                                                                                                                                                                                                                                                                 |
| <b>Trastuzumab for &lt;1 y</b>                     |                                                                                                                                                                                                                                                  |                                   |                                                                                                                                                                                        |                                                                                                                                                                                                                                                                                                                                                                                                                                                                                                                                                                                                                                                                                                                                                                                                         |
| FinHer <sup>15,16</sup>                            | 3 cycles docetaxel or vinorelbine<br>• HER2+ secondary randomization<br>to trastuzumab or not for 9 w<br>administered together with<br>docetaxel or vinorelbine<br>FEC administered after<br>docetaxel/vinorelbine ± trastuzumab<br>was complete | 232                               | 1010 pts overall, 232 HER2+<br><br>N+ or high-risk N0 (tumour<br>diameter >20 mm, and PR-)                                                                                             | Median follow-up 62 mo, DDFS and OS rates:<br>• Docetaxel better than vinorelbine overall, DDFS HR=0.66, p=0.010; OS HR=0.70, p=0.086<br>• HER2+: trastuzumab better than chemotherapy alone, DDFS HR=0.65 (95% CI 0.38-1.12), p=0.12; OS HR=0.55, p=0.094<br>• HER2+, adjusted for nodal metastases: DDFS HR=0.57, p=0.047<br>• Docetaxel + trastuzumab + FEC better than docetaxel + FEC (DDFS HR=0.32, p=0.29; OS HR=0.42, p=0.14) and vinorelbine + trastuzumab + FEC (DDFS HR=0.31, p=0.20)<br>• Trastuzumab group had less heart failure (0.9% vs 1.7%) and change in median LVEF (0% vs 4% decrease)<br>• Subgroup with very high HER2 content (≥22-fold the median of HER2- cancers) did not benefit from trastuzumab (HR=1.23, p=0.75) whereas the rest of the HER2+ pts did (HR=0.52, p=0.05) |
| PHARE <sup>17-19</sup><br>NCT00381901<br>2006-2010 | 6 mo vs 12 mo trastuzumab                                                                                                                                                                                                                        | 3382                              | HER2+, early, at least 4 cycles<br>(neo)adjuvant chemotherapy;<br>median 2 cm, 45% N+, 58% ER+,<br>88% RT, 58% trastuzumab, 73%<br>anthracycline and taxane<br>containing chemotherapy | • Median follow-up 42.5 mo<br>• DFS HR=1.28 (1.05-1.56), non-inferiority of 6 mo vs 12 mo could not be demonstrated because the 95% CI crossed the prespecified non-inferiority margin of 1.15<br>• Results inconclusive but trend in favour of 12 mo overall; subgroup analysis not yet complete<br>• Higher cardiotoxicity in 12 mo group (5.7% vs 1.9%)                                                                                                                                                                                                                                                                                                                                                                                                                                              |
| E-2198 <sup>20</sup><br>NCT00003992<br>[abstract]  | Arm A: Paclitaxel + trastuzumab<br>(q3wx4)→AC<br>Arm B: same regimen + trastuzumab<br>for 52 w                                                                                                                                                   | 234                               | HER2+, Stage II                                                                                                                                                                        | Median follow-up 64 mo<br>DFS equivalent for arms B and A (73% vs 76%, p=0.55)<br>Congestive heart failure rate same (Arm B, N=4; Arm A, N=3)                                                                                                                                                                                                                                                                                                                                                                                                                                                                                                                                                                                                                                                           |
| PERSEPHONE <sup>21</sup>                           | 6 vs 12 mo trastuzumab                                                                                                                                                                                                                           | Planned                           | HER2+, early                                                                                                                                                                           | Ongoing                                                                                                                                                                                                                                                                                                                                                                                                                                                                                                                                                                                                                                                                                                                                                                                                 |

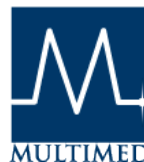

| Study                                              | Trial arms                                                                                                                                                                                                         | N                     | Characteristics                                                                                                                                                                                                                                                                             | Outcome                                                                                                                                                                                                                                                                                                                                                                                                                                                                                                                                                                                                                                                                                                                                                                                                                                                                                                                                                                                                                                                                                                                                                                                                                                                                                                                                                                         |
|----------------------------------------------------|--------------------------------------------------------------------------------------------------------------------------------------------------------------------------------------------------------------------|-----------------------|---------------------------------------------------------------------------------------------------------------------------------------------------------------------------------------------------------------------------------------------------------------------------------------------|---------------------------------------------------------------------------------------------------------------------------------------------------------------------------------------------------------------------------------------------------------------------------------------------------------------------------------------------------------------------------------------------------------------------------------------------------------------------------------------------------------------------------------------------------------------------------------------------------------------------------------------------------------------------------------------------------------------------------------------------------------------------------------------------------------------------------------------------------------------------------------------------------------------------------------------------------------------------------------------------------------------------------------------------------------------------------------------------------------------------------------------------------------------------------------------------------------------------------------------------------------------------------------------------------------------------------------------------------------------------------------|
| [abstracts]                                        | Test for non-inferiority of 6 mo treatment                                                                                                                                                                         | 4000;<br>3080 to date |                                                                                                                                                                                                                                                                                             | Recruitment expected to be completed late 2015 and first interim analysis mid-2016                                                                                                                                                                                                                                                                                                                                                                                                                                                                                                                                                                                                                                                                                                                                                                                                                                                                                                                                                                                                                                                                                                                                                                                                                                                                                              |
| <b>Trastuzumab for 1 or 2 y</b>                    |                                                                                                                                                                                                                    |                       |                                                                                                                                                                                                                                                                                             |                                                                                                                                                                                                                                                                                                                                                                                                                                                                                                                                                                                                                                                                                                                                                                                                                                                                                                                                                                                                                                                                                                                                                                                                                                                                                                                                                                                 |
| HERA <sup>22-24</sup><br>BIG 1-01<br><br>2001-2005 | Trastuzumab for 1 and 2 y (not reported) vs observation; all groups after standard neoadjuvant, adjuvant chemotherapy or both<br>After 1 y, the control group was allowed to cross-over to trastuzumab and 52% did | 3401                  | HER2+, early, 50% HR+, 33% N0<br>Inclusion criteria was N+ or N0 if >1 cm<br><br>For N0:<br>60 pts <1 cm<br>33 pts 1 cm<br>510 pts >1 cm and <2 cm<br>484 pts ≥2 cm<br><br>566 pts HR- N0<br>533 pts HR+ N0<br><br>68% anthracyclines,<br>26% anthracycline + taxane<br>6% no anthracycline | Median follow-up 48.4 mo, 4-y survival rate results, trastuzumab vs control<br>Intention-to-treat analysis:<br><ul style="list-style-type: none"> <li>DFS: 78.6% vs 72.2%, HR=0.76 (95% CI 0.66-0.87), p&lt;0.0001</li> <li>OS: 89.3% vs 87.7%, HR=0.85 (95% CI 0.70-1.04), p=0.11</li> </ul> Censored for crossover<br><ul style="list-style-type: none"> <li>DFS 78.6% vs 71.7%, HR=0.69, p&lt;0.0001</li> <li>OS 89.3% vs 81.5%, HR=53 (95% CI 0.44-0.65), p&lt;0.0001</li> </ul> Crossover pts vs control<br><ul style="list-style-type: none"> <li>Fewer DFS events: HR=0.68 (95% CI 0.51-0.90), p=0.0077</li> </ul> More grade 3-4 (14% vs 8%) and fatal adverse events (1% vs 0.5%) on trastuzumab than observation<br><br>3-y DFS (1 y trastuzumab vs observation):<br>N0 (all sizes): 90.8% vs 84.9%, HR=0.59 (95% CI 0.39-0.91)<br>N0 (1.1-2 cm): 91.3% vs 86.7%, HR=0.53 (95% CI 0.26-1.07)<br>N+ (N1 ): 84.7% vs 75.9%, HR=0.61 (95% CI 0.43-0.87)<br>N+ (N2+): 67.8% vs 62.2%, HR=0.64 (95% CI 0.49-0.83)<br>HR- N0: 87.1% vs 86.5%, HR=0.68 (95% CI 0.40-1.16)<br>HR+ N0: 94.8% vs 83.4%, HR=0.46 (95% CI 0.23-0.93)<br><br>2-y DFS (1 y trastuzumab vs observation)<br>N0: HR=0.59 (95% CI 0.39-0.91)<br>N1: HR=0.61 (95% CI 0.43-0.87)<br>N2: HR=0.64 (95% CI 0.49-0.83)<br>T1 (0-2 cm): HR=0.65 (95% CI 0.47-0.90)<br>T2 (>2-5 cm): HR=0.55 (95% CI 0.43-0.71) |
| HERA <sup>25</sup>                                 | See previous entry in table                                                                                                                                                                                        | 5102                  | Included landmark analysis of 3105 pts ( 2 vs 1 y trastuzumab) disease-free 1 y after randomization to trastuzumab                                                                                                                                                                          | Median follow-up 8 y<br><ul style="list-style-type: none"> <li>DFS: 23.6% in both 2-y and 1-y group, HR=0.99 (95% CI 0.85-1.14), p=0.86</li> <li>DFS: 1 y vs observation, HR=0.76 (95% CI 0.67-0.86), p&lt;0.0001</li> <li>OS: 1 y vs observation, HR=0.76 (95% CI 0.65-0.88), p=0.0005 despite crossover of 52% of pts from observation to trastuzumab</li> </ul>                                                                                                                                                                                                                                                                                                                                                                                                                                                                                                                                                                                                                                                                                                                                                                                                                                                                                                                                                                                                              |



| Study                                    | Trial arms                                                    | N    | Characteristics                       | Outcome                                                                                                                                                                                                                                                                                                                                                                                                                                                                                                                                                                                                                                                                                                                                                                                                                                                                                                                                                                                                                                                                                        |
|------------------------------------------|---------------------------------------------------------------|------|---------------------------------------|------------------------------------------------------------------------------------------------------------------------------------------------------------------------------------------------------------------------------------------------------------------------------------------------------------------------------------------------------------------------------------------------------------------------------------------------------------------------------------------------------------------------------------------------------------------------------------------------------------------------------------------------------------------------------------------------------------------------------------------------------------------------------------------------------------------------------------------------------------------------------------------------------------------------------------------------------------------------------------------------------------------------------------------------------------------------------------------------|
|                                          |                                                               |      |                                       | <ul style="list-style-type: none"> <li>• More pts had grade 3–4 adverse events in the 2 y group than 1 y group (20.4% vs 16.3%) or observation (8.2%). Included neoplasms, infections; nervous system, vascular, cardiac, musculoskeletal, gastrointestinal disorders (no significance values stated for these)</li> <li>• Conclude 2 y trastuzumab is not more effective than 1 y; 1 y remains standard of care</li> </ul>                                                                                                                                                                                                                                                                                                                                                                                                                                                                                                                                                                                                                                                                    |
| HERA, BIG 1–01 <sup>26</sup>             | See previous entry in table                                   | 5102 |                                       | <p>Median follow-up 8 y</p> <ul style="list-style-type: none"> <li>• Cardiac adverse events leading to discontinuation of trastuzumab 9.4% in 2–y arm and 5.2% in 1–y arm</li> <li>• 2 y vs 1 y vs observation: Severe congestive heart failure rate (0.8%, 0.8%, 0.0%) and confirmed significant LVEF decrease (7.2%, 4.1%, 0.9%) were significantly greater in both trastuzumab arms compared with controls</li> <li>• Acute recovery reached in 87.5% receiving 2–y trastuzumab and 81.2% of pts with 1–y trastuzumab</li> </ul>                                                                                                                                                                                                                                                                                                                                                                                                                                                                                                                                                            |
| HERA <sup>27</sup>                       | See previous entry in table<br>1 y trastuzumab vs observation | 3401 |                                       | Competing risks analysis of cumulative incidence of first DFS events in the CNS vs other sites after median follow-up 4 y: CNS as first relapse 2% trastuzumab vs 2% control, p=0.55                                                                                                                                                                                                                                                                                                                                                                                                                                                                                                                                                                                                                                                                                                                                                                                                                                                                                                           |
| <b>Lapatinib (± trastuzumab) for 1 y</b> |                                                               |      |                                       |                                                                                                                                                                                                                                                                                                                                                                                                                                                                                                                                                                                                                                                                                                                                                                                                                                                                                                                                                                                                                                                                                                |
| TEACH <sup>28-30</sup>                   | Lapatinib (1500 mg) vs placebo daily for 12 m                 | 3147 | HER2+, previous adjuvant chemotherapy | <p>Median follow-up 48 mo, lapatinib vs placebo:</p> <ul style="list-style-type: none"> <li>• DFS 87% vs 83%, HR=0.83 (95% CI 0.70–1.00), p=0.053</li> <li>• OS 94% vs 94%, HR=0.99 (95% CI 0.74–1.31), p=0.96</li> <li>• HR– pts: DFS 87% vs 80%, HR=0.68 (95% CI 0.52–0.89), p=0.006 <ul style="list-style-type: none"> <li>• N0 subgroup: HR=0.57 (95% CI 0.35–0.92)</li> <li>• N+ subgroup: HR=0.74 (95% CI 0.53–1.03)</li> <li>• Premenopausal HR=0.59 (95% CI 0.37–0.94)</li> </ul> </li> <li>• HR+ pts: DFS HR=0.98 (95% CI 0.77–1.25), p=0.89</li> <li>• Central review as HER2+ (79% of pts): DFS 87% lapatinib vs 83% placebo, HR=0.82 (95% CI 0.67–1.00), p=0.04</li> <li>• HER2– or borderline by central FISH testing: DFS 85% vs 81%, HR=0.94 (95% CI 0.56–1.57)</li> </ul> <p>More serious grade 3/4 adverse events with lapatinib than placebo (6% vs 5%): diarrhea 6% vs 0.6%, rash 5% vs 0.2%, hepatobiliary disorders 2% vs 0.1%</p> <p>Any adverse effect: diarrhea 61% vs 16% (p&lt;0.0001), rash 59% vs 15% (p&lt;0.0001), hepatobiliary disorders 8% vs 3% (p=0.21)</p> |



| Study                                                                            | Trial arms                                                                                                                                                                                                                                                                                                                                             | N    | Characteristics                                                                                                                                                              | Outcome                                                                                                                                                                                                                                                                                                                                                                                                                                                                                                                                                                                                                                                                                                                                                                                                                                                                                                                               |
|----------------------------------------------------------------------------------|--------------------------------------------------------------------------------------------------------------------------------------------------------------------------------------------------------------------------------------------------------------------------------------------------------------------------------------------------------|------|------------------------------------------------------------------------------------------------------------------------------------------------------------------------------|---------------------------------------------------------------------------------------------------------------------------------------------------------------------------------------------------------------------------------------------------------------------------------------------------------------------------------------------------------------------------------------------------------------------------------------------------------------------------------------------------------------------------------------------------------------------------------------------------------------------------------------------------------------------------------------------------------------------------------------------------------------------------------------------------------------------------------------------------------------------------------------------------------------------------------------|
| ALTTO<br>BIG 2-06<br>NCCTG N063D <sup>31,32</sup><br>[abstract]                  | Lapatinib +trastuzumab (52 w) vs<br>trastuzumab (12w) → lapatinib (34 w<br>after 6 w delay) vs lapatinib (52 w) vs<br>trastuzumab (52 w)<br><br><ul style="list-style-type: none"> <li>N=4613 after chemotherapy</li> <li>N=3337 concurrent with<br/>anthracycline → taxane</li> <li>N=431 concurrent with platinum-<br/>containing regimen</li> </ul> | 8381 | Recruitment June 2007 to July<br>2011, L arm closed Aug 2011 for<br>futility<br><br>40% N0, 57% HR+                                                                          | Median follow-up 4.5 y, 4-y DFS<br>Lapatinib + trastuzumab vs trastuzumab: 88% vs 86%, HR=0.84<br>(95% CI 0.70–1.02), p=0.048<br>Trastuzumab → lapatinib vs trastuzumab: 87% vs 86%, HR=0.93<br>(95% CI 0.76–1.13), p=0.044 both not significant at author's cut-off of<br>p=0.025<br>Diarrhea (75% vs 20%), rash (55% vs 20%), hepatobiliary adverse<br>effects (23% vs 16%) were more frequent in lapatinib + trastuzumab<br>vs trastuzumab<br>Primary cardiac endpoints <1% in all arms<br>Quality of life substudy (N=777): worse in all arms at 12 w but<br>returned to baseline by end of treatment at 52 w<br>Follow-up continues                                                                                                                                                                                                                                                                                              |
| <b>Trastuzumab for 1 y</b>                                                       |                                                                                                                                                                                                                                                                                                                                                        |      |                                                                                                                                                                              |                                                                                                                                                                                                                                                                                                                                                                                                                                                                                                                                                                                                                                                                                                                                                                                                                                                                                                                                       |
| NSABP B31 and NCCTG<br>N9831 combined<br>analysis <sup>33</sup><br><br>2000–2005 | AC→ paclitaxel ± trastuzumab<br>N9831 Arms A and C, NSABP B31<br>Groups 1 and 2, see later in this table                                                                                                                                                                                                                                               | 4045 | See later in this table                                                                                                                                                      | Median follow-up 3.9 y, significant improvement favouring<br>trastuzumab<br><ul style="list-style-type: none"> <li>DFS: HR=0.52 (95% CI 0.45–0.60), p&lt;0.001</li> <li>OS: 39% reduction, HR=0.61 (95% CI 0.50–0.75), p&lt;0.001</li> </ul> Analyzed by nodal status, significant only for N+ <ul style="list-style-type: none"> <li>0 nodes: 4-y DFS 86.8% vs 89.6%, events HR=1.78<br/>(95% CI 0.3–10.7) (not significant, only 33 events occurred)</li> <li>1–3: DFS 89.7% vs 80.6%, HR=0.58 (95% CI 0.40–0.82)</li> <li>4–9: DFS 83.5% vs 71.1%, HR=0.68 (95% CI 0.48–0.98)</li> <li>10+: DFS 73.7% vs 46.5%, HR=0.55 (95% CI 0.38–0.81)</li> </ul> Effective for all tumour sizes<br>0–2 cm: DFS 90.9% vs 81.6%, HR=0.39 (95% CI 0.26–0.60)<br>2.1–5 cm: DFS 83.2 vs 70.3%, HR=0.72 (95% CI 0.55–0.94)<br>>5 cm: DFS 78.2% vs 52%, HR=0.61 (95% CI 0.35–1.06)<br>Effect was similar for all tumour grades, and both HR+ and HR- |
| NCCTG N9831 <sup>34-39</sup><br><br>2000–2005                                    | <ul style="list-style-type: none"> <li>Arm A: AC (q3wx4 ) → paclitaxel<br/>(q1wx12)</li> <li>Arm, B (sequential):<br/>AC → paclitaxel → trastuzumab<br/>(q1wx52)</li> <li>Arm C (concurrent):<br/>AC → paclitaxel + trastuzumab<br/>(q1wx12) → trastuzumab (q1wx4)</li> </ul>                                                                          | 3505 | HER2+, operable, Stage I-III, N+<br>or high-risk N0<br>39% <2 cm<br>51% between 2.1–4.9 cm<br>8% ≥5 cm<br>13% N0<br><br>Initially only N+<br>disease; as of May 2, 2003, pts | <ul style="list-style-type: none"> <li>Median follow-up 6 y, 5-y results<sup>34</sup></li> <li>Arm B vs A: DFS 80.1% vs 71.8%, HR=0.69<br/>(95% CI 0.57–0.85), p&lt;0.001; OS: 89.3% vs 88.4%, HR=0.88<br/>(95% CI 0.67–1.15), p=0.343</li> <li>Arm C vs B: DFS 84.4% vs 80.1%, HR=0.77<br/>(95% CI 0.53–1.11)</li> <li>Trend toward increase in DFS with C compared with B<br/>(concurrent vs sequential), but not significant because the p<br/>value (0.02) did not cross the prespecified O'Brien-Fleming</li> </ul>                                                                                                                                                                                                                                                                                                                                                                                                              |





| Study                                                    | Trial arms                                                                                                                                                                                                                                                                         | N    | Characteristics                                                                                                                                                                                                                                                                                                   | Outcome                                                                                                                                                                                                                                                                                                                                                                                                                                                                                                                                                                                                                                                                                                                                                                                                                                                                                                                                                                                                                                                                                                                                  |
|----------------------------------------------------------|------------------------------------------------------------------------------------------------------------------------------------------------------------------------------------------------------------------------------------------------------------------------------------|------|-------------------------------------------------------------------------------------------------------------------------------------------------------------------------------------------------------------------------------------------------------------------------------------------------------------------|------------------------------------------------------------------------------------------------------------------------------------------------------------------------------------------------------------------------------------------------------------------------------------------------------------------------------------------------------------------------------------------------------------------------------------------------------------------------------------------------------------------------------------------------------------------------------------------------------------------------------------------------------------------------------------------------------------------------------------------------------------------------------------------------------------------------------------------------------------------------------------------------------------------------------------------------------------------------------------------------------------------------------------------------------------------------------------------------------------------------------------------|
|                                                          | RT or hormonal therapy after completion of chemotherapy when indicated                                                                                                                                                                                                             |      | with high-risk N0 (>2 cm +HR+; or >1 cm and HR-)                                                                                                                                                                                                                                                                  | <p>boundary (0.00116) for the interim analysis</p> <ul style="list-style-type: none"> <li>Cardiac events (congestive heart failure or cardiac death): 3-y cumulative incidence 0.3%, 2.8%, 3.3% in Arms A, B, C, respectively; cardiac function improved following trastuzumab discontinuation and cardiac medication<sup>35</sup></li> <li>Did not find association between MYC amplification and additional trastuzumab benefit<sup>37</sup></li> <li>Trastuzumab benefit seemed independent of HER2 centromere 17 ratio and chromosome 17 copy number<sup>38</sup></li> <li>Both HR+ and HR- pts benefit from trastuzumab (HR=0.42, p=0.005 and HR=0.60, p=0.0001)<sup>38</sup></li> </ul>                                                                                                                                                                                                                                                                                                                                                                                                                                            |
| NSABP B-31 <sup>33,40</sup><br>2000-2005                 | AC (q3wx4) → paclitaxel (q3wx4 or q1wx12) vs<br>AC → paclitaxel + trastuzumab (P=q3wx4 or q1wx12; H=q1wx52)                                                                                                                                                                        | 2101 | HER2+, operable, N+                                                                                                                                                                                                                                                                                               | <p>See joint analysis with NCCTG N9831 previous entry in table<br/>Cardiac function assessment at 7-y follow-up</p> <ul style="list-style-type: none"> <li>Cardiac events: 4.0% trastuzumab vs 1.3% control; RR=3.30 (95% CI 1.63-6.66), p&lt;0.001</li> <li>One cardiac death in each arm</li> <li>Most pts recovered LVEF in the normal range after stopping trastuzumab, although some decline from baseline often persists</li> </ul>                                                                                                                                                                                                                                                                                                                                                                                                                                                                                                                                                                                                                                                                                                |
| BCIRG 006,<br>UCLA-0102006 <sup>41,42</sup><br>2001-2004 | <ul style="list-style-type: none"> <li>[AC → TH]: AC q3wx4 → T q3wx4, trastuzumab q1w during chemotherapy then q3w until 1 y</li> <li>TCH: Docetaxel + carboplatin (q3wx6) + trastuzumab (q1w during chemotherapy then q3w until 1 y)</li> <li>AC→T: AC q3wx4 → T q3wx4</li> </ul> | 3222 | <p>HER2+, early</p> <p>T1-3, N0-1, M0;<br/>N+ or high risk N0 (N=922);<br/>for N0 (assessed by SLNB or at least 6 nodes resected) at least one risk factor of age ≤35 y, tumour &gt;2 cm, HR-, histological and/or nuclear grade 2/3</p> <p>29% N0, 38% N1, 23% N2, 10% N3<br/>40% T1 (≤2 cm),<br/>53% 2-5 cm</p> | <p>Median follow-up 65 mo</p> <ul style="list-style-type: none"> <li>AC → TH vs AC → T <ul style="list-style-type: none"> <li>DFS: 84% vs 75%, HR=0.64, p&lt;0.001 <ul style="list-style-type: none"> <li>N0: 93% vs 85%, HR=0.47 (95% CI 0.28-0.77), p=0.0028</li> <li>N+ : 80% vs 71%, HR=0.68 (95% CI 0.56-0.84), p=0.0003</li> <li>N+ (≥4 nodes): HR=0.66 (95% CI 0.51-0.86), p=0.0017</li> <li>Tumour size &lt;1 cm: HR=0.36 (95% CI 0.14-0.93), p=0.034</li> <li>Tumour size &lt;2 cm: HR=0.73 (95% CI 0.49-1.09)</li> <li>Tumour size ≥2 cm: HR=0.62 (95% CI 0.50-0.76), p&lt;0.0001</li> </ul> </li> <li>OS: 92% vs 87%, HR=0.63, p&lt;0.001 <ul style="list-style-type: none"> <li>N0: HR=0.38 (95% CI 0.17-0.87)</li> <li>N+: HR=0.67 (95% CI 0.50-0.88)</li> <li>Tumour size &lt;2 cm: HR=0.49 (95% CI 0.27-0.91)</li> <li>Tumour size ≥2 cm: HR=0.66 (95% CI 0.49-0.88)</li> </ul> </li> </ul> </li> <li>TCH vs AC → T <ul style="list-style-type: none"> <li>DFS: 81% vs 75%, HR=0.75, p=0.04 <ul style="list-style-type: none"> <li>N0: 90% vs 85%, HR=0.64 (95% CI 0.41-1.01), p=0.057</li> </ul> </li> </ul> </li> </ul> |



| Study                        | Trial arms                                                                                       | N    | Characteristics                             | Outcome                                                                                                                                                                                                                                                                                                                                                                                                                                                                                                                                                                                                                                                                                                                                                                                                                                                                                                                                                                                                                                                                                                                                                                                                                                                                                                             |
|------------------------------|--------------------------------------------------------------------------------------------------|------|---------------------------------------------|---------------------------------------------------------------------------------------------------------------------------------------------------------------------------------------------------------------------------------------------------------------------------------------------------------------------------------------------------------------------------------------------------------------------------------------------------------------------------------------------------------------------------------------------------------------------------------------------------------------------------------------------------------------------------------------------------------------------------------------------------------------------------------------------------------------------------------------------------------------------------------------------------------------------------------------------------------------------------------------------------------------------------------------------------------------------------------------------------------------------------------------------------------------------------------------------------------------------------------------------------------------------------------------------------------------------|
|                              |                                                                                                  |      |                                             | <ul style="list-style-type: none"> <li>• N+: 78% vs 71%, HR=0.78 (95% CI 0.64–0.95), p=0.013</li> <li>• N+ (≥4 nodes): HR=0.66 (95% CI 0.51–0.86), p=0.0016</li> <li>• Tumour size &lt;1 cm: HR=0.45 (95% CI 0.17–1.16), p=0.096</li> <li>• Tumour size &lt;2 cm: HR=1.11 (95% CI 0.73–1.69), p=0.64</li> <li>• Tumour size ≥2 cm: HR=0.70 (95% CI 0.57–0.87), p=0.0009</li> <li>• OS: 91% vs 87%, HR=0.77, p=0.04</li> <li>• N0: HR=0.56 (95% CI 0.27–1.13)</li> <li>• N+: HR=0.81 (95% CI 0.62–1.05)</li> <li>• Tumour size &lt;2 cm: HR=0.75 (95% CI 0.43–1.29)</li> <li>• Tumour size ≥2 cm: 0.77 (95% CI 0.58–1.02)</li> <li>• No significant difference in OS or DFS among trastuzumab regimens, but both superior to AC→T (AC→TH stronger effect in some subgroups)</li> <li>• Benefit in N0, N+, and high risk N+ (≥4 positive nodes)</li> <li>• Without TOP2A co-amplification: DFS benefit with trastuzumab even larger, but trastuzumab had no DFS benefit in TOP2A co-amplified (but TCH still better therapeutic index because of adverse effects profile)</li> <li>• Congestive heart failure and cardiac dysfunction higher in AC→T + trastuzumab than TCH (p&lt;0.001)</li> <li>• 7 acute leukemia in AC-based regimens vs 1 in TCH group (but received anthracycline outside the study)</li> </ul> |
| BCIRG 006 <sup>43</sup>      | See previous entry in table                                                                      | 3222 |                                             | <p>Health-Related Quality of Life questionnaire, assessed at baseline (all groups similar), midpoint (cycle 4), end of chemotherapy, 12-mo follow-up:</p> <ul style="list-style-type: none"> <li>• Physical scale, global health, and systemic effects deteriorated for all groups but recovered by 12 mo</li> <li>• Repeated measurement analysis found significantly better physical, global health, and less systemic effects with TCH</li> </ul>                                                                                                                                                                                                                                                                                                                                                                                                                                                                                                                                                                                                                                                                                                                                                                                                                                                                |
| FNCLCC PACS-04 <sup>44</sup> | FEC or epirubicin/docetaxel; HER2+ secondary randomization to trastuzumab for 1 y or observation | 3010 | 3010 pts overall, N+; 528 in HER2+ subgroup | <p>Median follow-up 47 mo</p> <p>14% reduction in risk of relapse with trastuzumab, HR=0.86 (95% CI 0.61–1.22), p=0.41</p> <p>3-y DFS: 81% vs 78%, HR=0.86 (95% CI 0.61–1.22)</p> <p>OS: 95% vs 96%, HR=1.27 (95% CI 0.68–2.38)</p> <p>Of trastuzumab group, 10% did not receive trastuzumab and 18% discontinued trastuzumab before 6 mo due to cardiac events or progressive disease</p>                                                                                                                                                                                                                                                                                                                                                                                                                                                                                                                                                                                                                                                                                                                                                                                                                                                                                                                          |



| Study                                                           | Trial arms                                                                                                                                                          | N               | Characteristics                                                                                                                                                                                                                                                               | Outcome                                                                                                                                                         |
|-----------------------------------------------------------------|---------------------------------------------------------------------------------------------------------------------------------------------------------------------|-----------------|-------------------------------------------------------------------------------------------------------------------------------------------------------------------------------------------------------------------------------------------------------------------------------|-----------------------------------------------------------------------------------------------------------------------------------------------------------------|
| N-SAS BC 07<br>RESPECT <sup>45</sup>                            | Trastuzumab monotherapy for 1 y vs<br>trastuzumab + chemotherapy                                                                                                    | 300<br>planned  | HER2+, Age >70 y, Stage I, IIA,<br>IIB, IIIA/M0                                                                                                                                                                                                                               | Protocol only                                                                                                                                                   |
| <b>Trastuzumab in HER2 low pts (IHC 1+ or 2+)</b>               |                                                                                                                                                                     |                 |                                                                                                                                                                                                                                                                               |                                                                                                                                                                 |
| NSABP B-47 <sup>46</sup>                                        | Chemotherapy ± 1 y of trastuzumab<br><br>Chemotherapy by physician choice,<br>either TC (q3wx6) or AC (q3wx4 or<br>q2wx4) ) plus paclitaxel (q1wx12)                | 3260<br>planned | HER2 IHC 1+ or 2+ scores but<br>non-amplified by FISH<br>N+ or high-risk N0                                                                                                                                                                                                   | Ongoing<br>1416 enrolled Feb 2011–Jan 2013                                                                                                                      |
| <b>Second agent (pertuzumab or neratinib) after trastuzumab</b> |                                                                                                                                                                     |                 |                                                                                                                                                                                                                                                                               |                                                                                                                                                                 |
| ExteNET,<br>NCT00878709 <sup>47</sup>                           | Neratinib for 1 y vs placebo                                                                                                                                        | 2842            | HER2+, N+ pts who completed<br>adjuvant trastuzumab within 1 y<br>before randomization                                                                                                                                                                                        | No results released yet, recruitment completed 2012, see<br><a href="http://clinicaltrials.gov/show/NCT00878709">http://clinicaltrials.gov/show/NCT00878709</a> |
| APHINITY<br>BIG 4–11<br>NCT01358877 <sup>48</sup>               | 1 y trastuzumab + pertuzumab vs<br>trastuzumab<br><br>Chemotherapy is investigator's choice<br>between anthracycline-taxane or<br>taxane-platin containing regimens | 4800            | HER2+ with excision of tumour<br>and adjuvant chemotherapy; either <ul style="list-style-type: none"> <li>• N+ (pN1),</li> <li>• N0 and T&gt;1cm,</li> <li>• or N0 and T 0.5–1 cm and one<br/>of grade 3, ER–/PR–, age<br/>&lt;35 y</li> </ul> Randomized 3–7 w after surgery | Ongoing<br>Accrual complete August 2013 <sup>49</sup>                                                                                                           |

Abbreviations: AC; doxorubicin + cyclophosphamide; DDFS, distant disease-free survival; DFS, disease-free survival; EC, epirubicin + cyclophosphamide; ER, estrogen receptor; FEC, fluorouracil + epirubicin + cyclophosphamide; HER2, human epidermal growth factor receptor 2; HR-, hormone receptor negative; HR+, hormone receptor positive; LVEF, left ventricular ejection fraction; LABC, locally-advanced breast cancer; N+, node-positive; N0, node-negative; OS, overall survival; pCR, pathologically complete response; RT, radiation therapy; TCH, docetaxel + carboplatin + trastuzumab; T, docetaxel; T-DM1, trastuzumab emtansine; TH, docetaxel + trastuzumab.

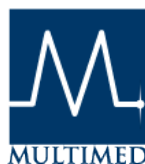

### Supplementary Appendix 1: Literature Search Strategy

1. (exp Breast Neoplasms/ or exp breast tumour/ or exp breast cancer/ or breast cancer.mp. or breast neoplasm:.mp. or ((cancer: or neoplasm: or tumo?:r: or carcinom:)) and (breast or mammar:)).mp)
2. exp chemoradiotherapy/ or exp chemotherapy, adjuvant/ or exp neoadjuvant therapy/ or exp adjuvant therapy/ or exp cancer hormone therapy/ or exp cancer adjuvant therapy/ or exp cancer combination chemotherapy/ or exp aromatase inhibitors/ or exp antineoplastic agents/ or (adjuvant or neoadjuvant or chemotherapy or hormonotherapy).mp.
3. (**Anthracycline#** or doxorubicin or Adriamycin or epirubicin or Ellence or **Alkylating agent#** or cyclophosphamide or Cytosan or Neosar or Fluorouracil or 5-fluorouracil or 5-FU or Aduvial or methotrexate or amethopterin or Mexate or Folex or Rheumatex or gemcitabine or Gemzar or **Taxane#** or docetaxel or Taxotere or paclitaxel or Taxol or Abraxane or carboplatin or Paraplatin or cisplatin or Platinol or TAC, ACMF, ACT, ATC, CAF, FAC, CEF, CMF or **Anti-estrogens** or **Selective Estrogen Receptor Modulator:** or **SERM:** or **Endocrine Therapy** or tamoxifen or Nolvadex or Apo-Tamox or Tamofen or Tamone or **Aromatase Inhibitor#** or anastrozole or Arimidex or exemestane or Aromasin or letrozole or Femara or fulvestrant or Faslodex or **HER2 inhibitor:** or trastuzumab or Herceptin or lapatinib or Tykerb or **Antiangiogenesis:** or bevacizumab or Avastin or **Granulocyte colony stimulating factor** or GCSF or Pegfilgrastim or Neulasta or filgrastim or Neupogen or **Bisphosphonate:** or Pamidronate or Aredia or zoledronic acid or Zometa).mp)
4. Ovariectomy/ or exp gonadotropin-releasing hormone/ or exp gonadorelin derivative/ or exp luteinizing hormone/ or (ovariectomy or (ovar: adj3 ablation) or (ovar: adj3 suppression) or (ovar: adj3 irradiation)).mp or (gnrh or gonadorelin or lhrh agonist or lhrn analog or leuprolide or buserelin or triptorelin or Lupron or goserelin or Zoladex or Trelstar).mp)
5. exp randomized controlled trial/ or exp "randomized controlled trial (topic)"/ or exp randomized controlled trials as topic/ or exp phase 2 clinical trial/ or exp phase 3 clinical trial/ or exp phase 4 clinical trial/ or exp clinical trials, phase II/ or exp clinical trials, phase III/ or exp clinical trials, phase IV/ or (randomized controlled trial or clinical trial, phase III or clinical trial, phase II).pt. or (random\$ control\$ trial? or rct or phase II or phase III or phase IV or phase 2 or phase 3 or phase 4).tw. or ((exp clinical trial/ or exp "clinical trial (topic)"/ or exp controlled study/ or clinical trial\$.mp. or clinicaltrial\$.mp.) and (random\$.tw. or randomization/)) or (random\$ adj3 trial\$).mp. or randomization/ or "clinicaltrials.gov".mp)
6. (meta-analysis.mp. or meta-analysis/ or meta-analysis.pt. or (meta-analy: or metaanaly: or meta analy:).tw. or (systematic review or systematic overview).mp. or (cochrane or MEDLINE or EMBASE or cancerlit).ti. or (hand search or hand-search or manual search).ti. or practice guideline\$.mp. or Practice Guideline/ or practice guideline.pt. or practice parameter:.tw)

1 and (2 or 3 or 4) and (5 or 6), limit to yr="2008 -Current", and duplicates removed

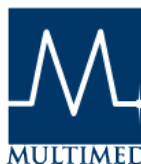

## REFERENCES

1. National Collaborating Centre for Cancer (developed for NICE). Early and locally advanced breast cancer: diagnosis and treatment. This guideline updates and replaces NICE technology appraisal guidance 109 (docetaxel), 108 (paclitaxel) and 107 (trastuzumab) [Internet]. Cardiff (Wales): National Collaborating Centre for Cancer; 2009 Feb [cited 2012 May 24]. Available from: [www.nice.org.uk/guidance/cg80/resources/guidance-early-and-locally-advanced-breast-cancer-pdf](http://www.nice.org.uk/guidance/cg80/resources/guidance-early-and-locally-advanced-breast-cancer-pdf)
2. Trudeau M, Madarnas Y, McCready D, Pritchard KI, Messersmith H, and the Breast Cancer Disease Site Group. The role of trastuzumab in adjuvant and neoadjuvant therapy in women with HER2/neu-overexpressing breast cancer [Internet]. Version 2. Toronto (ON): Cancer Care Ontario; 2011 Sep 15 [reviewed by Madarnas Y, Tey R 2009; endorsed 2010 Jun 11]; cited 2012 May 24]. Program in Evidence-Based Care Evidence-Based Series No.: 1-24. Available from: <https://www.cancercare.on.ca/common/pages/UserFile.aspx?fileId=13890>
3. Dhesy-Thind B, Pritchard K, Messersmith H, *et al.* The role of HER2/neu in systemic and radiation therapy for women with breast cancer [Internet]. Toronto (ON): Cancer Care Ontario; 2011 [2006 Nov 10; archived 2011 Apr; cited 2012 Oct 6]. Program in Evidence-Based Care Evidence-Based Series No.: 1-17. Available from: <https://www.cancercare.on.ca/common/pages/UserFile.aspx?fileId=13878>
4. National Breast Cancer Centre, Olver I, Chirgwin J, *et al.* Recommendations for use of trastuzumab (Herceptin) for the treatment of HER2-positive breast cancer. Incorporates published evidence to November 2006 [Internet]. Camperdown (NSW, Australia): National Breast Cancer Centre (NBCC; now part Cancer Australia); 2007 Mar [cited 2012 May 24].
5. Baselga J, Bradbury I, Eidtmann H, *et al.* Lapatinib with trastuzumab for HER2-positive early breast cancer (NeoALTTO): a randomised, open-label, multicentre, phase 3 trial. *Lancet*. 2012;379:633-40. [Erratum in: *Lancet*. 2012 Feb 18;379(9816):616].
6. Azim Jr HA, Agbor-Tarh D, Bradbury I, *et al.* Pattern of rash, diarrhea, and hepatic toxicities secondary to lapatinib and their association with age and response to neoadjuvant therapy: analysis from the NeoALTTO trial. *J Clin Oncol*. 2013;31:4504-11.
7. Buzdar AU, Suman VJ, Meric-Bernstam F, *et al.* Fluorouracil, epirubicin, and cyclophosphamide (FEC-75) followed by paclitaxel plus trastuzumab versus paclitaxel plus trastuzumab followed by FEC-75 plus trastuzumab as neoadjuvant treatment for patients with HER2-positive breast cancer (Z1041): a randomised, controlled, phase 3 trial. *Lancet Oncol*. 2013;14:1317-25. Epub: 2013 Nov 19.
8. Buzdar A, Suman V, Meric-Bernstam F, *et al.* Preliminary safety data of a randomized phase III trial comparing a preoperative regimen of FEC-75 alone followed by paclitaxel plus trastuzumab with a regimen of paclitaxel plus trastuzumab followed by FEC-75 plus trastuzumab in patients with HER2-positive operable breast cancer (ACOSOG Z1041) [abstract]. *J Clin Oncol*. 2010;28:Abstract no. 594.
9. Untch M, Loibl S, Bischoff J, *et al.* Lapatinib versus trastuzumab in combination with neoadjuvant anthracycline-taxane-based chemotherapy (GeparQuinto, GBG 44): A randomised phase 3 trial. *Lancet Oncol*. 2012;13:135-44.
10. von Minckwitz G, Eidtmann H, Loibl S, *et al.* Integrating bevacizumab, everolimus, and lapatinib into current neoadjuvant chemotherapy regimen for primary breast cancer. Safety results of the GeparQuinto trial. *Ann Oncol*. 2011;22:301-6.
11. Gianni L, Pienkowski T, Im Y-H, *et al.* Efficacy and safety of neoadjuvant pertuzumab and trastuzumab in women with locally advanced, inflammatory, or early HER2-positive breast

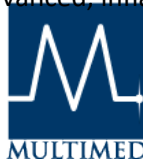

- cancer (NeoSphere): a randomised multicentre, open-label, phase 2 trial. *Lancet Oncol.* 2012;13:25-32.
12. Masuda N, Toi M, Ueno T, *et al.* A multicenter, randomized phase II study of neoadjuvant chemotherapy including trastuzumab with cyclophosphamide with docetaxel in patients with operable HER2-positive breast cancer (JBCRG-10 study) [abstract]. *J Clin Oncol.* 2010;28:Abstract no. TPS105.
  13. Masuda N, Sato N, Higaki K, *et al.* A prospective multicenter randomized phase II neo-adjuvant study of 5-fluorouracil, epirubicin and cyclophosphamide (FEC) followed by docetaxel, cyclophosphamide and trastuzumab (TCH) versus TCH followed by FEC versus TCH alone, in patients (pts) with operable HER2 positive breast cancer: JBCRG-10 study. [abstract]. *Cancer Res.* 2012;72:Abstract no. P1-14-08.
  14. Hofmann D, Nitz U, Gluz O, *et al.* WSG ADAPT - adjuvant dynamic marker-adjusted personalized therapy trial optimizing risk assessment and therapy response prediction in early breast cancer: Study protocol for a prospective, multi-center, controlled, non-blinded, randomized, investigator initiated phase II/III trial. 2013 [cited 2014 Jul 16]. *Trials* [serial on the Internet]. 14(1) Available from: <http://www.trialsjournal.com/content/14/1/261>
  15. Joensuu H, Bono P, Kataja V, *et al.* Fluorouracil, epirubicin, and cyclophosphamide with either docetaxel or vinorelbine, with or without trastuzumab, as adjuvant treatments of breast cancer: final results of the FinHer Trial. *J Clin Oncol.* 2009;27:5685-92.
  16. Joensuu H, Sperinde J, Leinonen M, *et al.* Very high quantitative tumor HER2 content and outcome in early breast cancer. *Ann Oncol.* 2011;22:2007-13.
  17. Pauporte I, Faure C, Pivot X. How to strengthen the French breast cancer clinical research: The example of the PHARE trial. [French]. *Impulser la recherche clinique francaise dans le cancer du sein: l'exemple de l'essai PHARE.* *Oncologie.* 2009;11:348-52.
  18. Pivot X, Romieu G, Bonnefoi H, *et al.* PHARE trial results comparing 6 to 12 months of trastuzumab in adjuvant early breast cancer. *Ann Oncol.* 2012;23:ixe2. Abstract no. LBA5\_PR. Available from: [http://annonc.oxfordjournals.org/content/23/suppl\\_9.toc](http://annonc.oxfordjournals.org/content/23/suppl_9.toc).
  19. Pivot X, Romieu G, Debled M, *et al.* 6 months versus 12 months of adjuvant trastuzumab for patients with HER2-positive early breast cancer (PHARE): a randomised phase 3 trial. *Lancet Oncol.* 2013;14:741-8. Epub: 2013 Jun 15.
  20. Sledge GW, O'Neill A, Thor A, *et al.* Adjuvant trastuzumab: long-term results of E2198 [abstract]. *Breast Cancer Res Treat.* 2006;100:S106. Abstract no. 2075.
  21. Earl H, Cameron D, Miles D, *et al.* PERSEPHONE is a randomised phase III controlled trial comparing six months of trastuzumab to the standard 12 months in patients with HER2 positive early breast cancer [abstract]. *Eur J Surg Oncol.* 2014;40:619. Abstract no. P033.
  22. Gianni L, Dafni U, Gelber RD, *et al.* Treatment with trastuzumab for 1 year after adjuvant chemotherapy in patients with HER2-positive early breast cancer: a 4-year follow-up of a randomised controlled trial. *Lancet Oncol.* 2011;12:236-44.
  23. Smith I, Procter M, Gelber RD, *et al.* 2-year follow-up of trastuzumab after adjuvant chemotherapy in HER2-positive breast cancer: a randomised controlled trial. *Lancet.* 2007;369:29-36.
  24. Untch M, Gelber RD, Jackisch C, *et al.* Estimating the magnitude of trastuzumab effects within patient subgroups in the HERA trial. *Ann Oncol.* 2008;19:1090-6.
  25. Goldhirsch A, Gelber RD, Piccart-Gebhart MJ, *et al.* 2 years versus 1 year of adjuvant trastuzumab for HER2-positive breast cancer (HERA): An open-label, randomised controlled trial. *Lancet.* 2013;382:1021-8.





26. de Azambuja E, Procter MJ, van Veldhuisen DJ, *et al.* Trastuzumab-associated cardiac events at 8 years of median follow-up in the Herceptin Adjuvant Trial (BIG 1-01). *J Clin Oncol.* 2014;32:2159-65. Epub: 2014 Jun 9.
27. Pestalozzi BC, Holmes E, de Azambuja E, *et al.* CNS relapses in patients with HER2-positive early breast cancer who have and have not received adjuvant trastuzumab: A retrospective substudy of the HERA trial (BIG 1-01). *Lancet Oncol.* 2013;14:244-8.
28. Goss PE, Smith IE, O'Shaughnessy J, *et al.* Adjuvant lapatinib for women with early-stage HER2-positive breast cancer: A randomised, controlled, phase 3 trial. *Lancet Oncol.* 2013;14:88-96.
29. Guerra YC, Chan A, Finkelstein DM, *et al.* Lack of efficacy of adjuvant lapatinib in HER2-negative breast cancer (HER2-ve BC): Analysis of patients in the TEACH trial [abstract]. *J Clin Oncol.* 2013;31:Abstract no. 628.
30. Smith IE, Finkelstein DM, O'Shaughnessy J, *et al.* Adjuvant lapatinib in women with early-stage HER2-positive breast cancer (HER2+ BC): Analysis of the hormone receptor-negative subgroup of the intent-to-treat (ITT) population of the TEACH trial [abstract]. *J Clin Oncol.* 2012;30:Abstract no. 596.
31. Piccart-Gebhart MJ, Holmes AP, Baselga J, *et al.* First results from the phase III ALTTO trial (BIG 2-06; NCCTG [Alliance] N063D) comparing one year of anti-HER2 therapy with lapatinib alone (L), trastuzumab alone (T), their sequence (T->L), or their combination (T+L) in the adjuvant treatment of HER2-positive early breast cancer (EBC) [abstract]. *J Clin Oncol.* 2014;32:Abstract no. LBA4.
32. Dueck AC, Hillman DW, Kottschade LA, *et al.* Quality of life (QOL) among patients (pts) with HER2+ breast cancer (bc) treated with adjuvant lapatinib and/or trastuzumab in the ALTTO study (BIG 2-06, Alliance N063D) [abstract]. *J Clin Oncol.* 2014;32:Abstract no. 647.
33. Perez EA, Romond EH, Suman VJ, *et al.* Four-year follow-up of trastuzumab plus adjuvant chemotherapy for operable human epidermal growth factor receptor 2-positive breast cancer: joint analysis of data from NCCTG N9831 and NSABP B-31. *J Clin Oncol.* 2011;29:3366-73.
34. Perez EA, Suman VJ, Davidson NE, *et al.* Sequential versus concurrent trastuzumab in adjuvant chemotherapy for breast cancer. *J Clin Oncol.* 2011;29:4491-7.
35. Perez EA, Suman VJ, Davidson NE, *et al.* Cardiac safety analysis of doxorubicin and cyclophosphamide followed by paclitaxel with or without trastuzumab in the North Central Cancer Treatment Group N9831 adjuvant breast cancer trial. *J Clin Oncol.* 2008;26:1231-8.
36. Perez EA, Dueck AC, McCullough AE, *et al.* Predictability of adjuvant trastuzumab benefit in N9831 patients using the ASCO/CAP HER2-positivity criteria. *J Natl Cancer Inst.* 2012;104:159-62.
37. Perez EA, Jenkins RB, Dueck AC, *et al.* C-MYC alterations and association with patient outcome in early-stage HER2-positive breast cancer from the north central cancer treatment group N9831 adjuvant trastuzumab trial. *J Clin Oncol.* 2011;29:651-9.
38. Perez EA, Reinholz MM, Hillman DW, *et al.* HER2 and chromosome 17 effect on patient outcome in the N9831 adjuvant trastuzumab trial. *J Clin Oncol.* 2010;28:4307-15.
39. Romond EH, Perez EA, Bryant J, *et al.* Trastuzumab plus adjuvant chemotherapy for operable HER2-positive breast cancer. *N Engl J Med.* 2005;353:1673-84.
40. Romond EH, Jeong JH, Rastogi P, *et al.* Seven-year follow-up assessment of cardiac function in NSABP B-31, a randomized trial comparing doxorubicin and cyclophosphamide followed by paclitaxel (ACP) with ACP plus trastuzumab as adjuvant therapy for patients with node-positive, human epidermal growth factor receptor 2-positive breast cancer. *J Clin Oncol.* 2012;30:3792-9.
41. Slamon D, Eiermann W, Robert N, *et al.* Adjuvant trastuzumab in HER2-positive breast cancer. *N Engl J Med.* 2011;365:1273-83.



42. Slamon D, Crown J, Pienkowski T. BCIRG 006. 2nd analysis presented at SABCS 2006 [Internet]. 2006 [cited 2011 Oct 27]. Available from: <http://www.bcirg.org/Internet/Studies/In+Breast+Cancer/BCIRG+006.htm>
43. Au HJ, Eiermann W, Robert NJ, *et al.* Health-related quality of life with adjuvant docetaxel- and trastuzumab-based regimens in patients with node-positive and high-risk node-negative, her2-positive early breast cancer: Results from the BCIRG 006 study. *Oncologist*. 2013;18:812-8.
44. Spielmann M, Roche H, Delozier T, *et al.* Trastuzumab for patients with axillary-node-positive breast cancer: results of the FNCLCC-PACS 04 trial. *J Clin Oncol*. 2009;27:6129-34.
45. Sawaki M, Tokudome N, Mizuno T, *et al.* Evaluation of trastuzumab without chemotherapy as a post-operative adjuvant therapy in HER2-positive elderly breast cancer patients: randomized controlled trial [RESPECT (N-SAS BC07)]. *Jpn J Clin Oncol*. 2011;41:709-12.
46. Fehrenbacher L, Jeong JH, Rastogi P, *et al.* NSABP B-47: A randomized phase III trial of adjuvant therapy comparing chemotherapy alone to chemotherapy plus trastuzumab in women with node-positive or high-risk node-negative HER2-low invasive breast cancer [abstract]. *J Clin Oncol*. 2013;31:Abstract no. TPS1139.
47. Goss PE, Barrios CH, Chan A, *et al.* A phase III trial of adjuvant neratinib (NER) after trastuzumab (TRAS) in women with early-stage HER2+ breast cancer (BC) [abstract]. *J Clin Oncol*. 2011;29:Abstract no. TPS137.
48. Von Minckwitz G, Baselga J, Bradbury I, *et al.* Adjuvant pertuzumab and herceptin in initial therapy of breast cancer: APHINITY (BIG 4-11/BO25126/TOC4939g) [abstract]. *Cancer Res*. 2011;71:Abstract no. OT1-02-4.
49. Breast International Group (BIG). The APHINITY trial has reached its recruitment target ahead of schedule! [Internet]. Brussels (Belgium): Breast International Group; 2014 [cited 2014 Jul 16]. Available from: <http://www.bigagainstbreastcancer.org/news/aphinity-trial-has-reached-its-recruitment-target-ahead-schedule/>

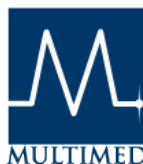

Supplement: CONC-22-S114-s001.pdf [file CONC-22-S114-s001.pdf]
